# Supplementary material for: Improved BCI calibration in multimodal emotion recognition using heterogeneous adversarial transfer learning
Source: PeerJ Comput Sci. 2025 Jan 20;11:e2649. doi: 10.7717/peerj-cs.2649 (PMC11784743; doi:10.7717/peerj-cs.2649)
Supplement: Supplemental Information 2 — Performance metrics for various methods applied on the SEED-V, DEAP and GraffitiVR dataset. Each row represents a different method, including traditional modalities (e.g., Non-EEG Sensory Data), Generative Adversarial Networks (GANs) like CGAN and CWGAN, and combined EEG and non-EEG sensory data approaches. The metrics include average accuracy, standard deviation of accuracy, average precision, precision standard deviation, average recall, recall standard deviation, along with specific accuracies and standard deviations for Support Vector Machines (SVM), Random Forest (RF), and Multi-Layer Perceptron (MLP) classifiers. Each sheet shows related dataset results. Last sheet, titled “Calibration,” displays performance metrics related to the calibration duration required for different data modalities in emotion recognition tasks using the GraffitiVR dataset. [file peerj-cs-11-2649-s002.xlsx]

## Sheet: performance
dataset	method	avg_accuracy	accuracy_stddev	avg_precision	precision_std	avg_recall	recall_std	svm_accuracy	svm_std	rf_accuracy	rf_std	mlp_accuracy	mlp_stdev
SEED-V	Only Non-EEG Sensory Data	0.5	0.06	0.5	0.07	0.51	0.07	0.5	0.09	0.51	0.07	0.49	0.06
SEED-V	CGAN	0.54	0.08	0.54	0.09	0.55	0.09	0.54	0.09	0.54	0.1	0.53	0.08
SEED-V	CWGAN	0.56	0.1	0.56	0.1	0.58	0.1	0.56	0.1	0.56	0.11	0.56	0.09
SEED-V	CWGAN-GP	0.59	0.09	0.6	0.09	0.6	0.09	0.59	0.1	0.59	0.06	0.58	0.08
SEED-V	Real EEG, Non-EEG Sensory Data	0.63	0.1	0.63	0.1	0.64	0.11	0.64	0.11	0.67	0.11	0.59	0.11
DEAP	Only Non-EEG Sensory Data	0.48	0.1	0.48	0.1	0.49	0.11	0.49	0.12	0.52	0.1	0.43	0.09
DEAP	CGAN	0.49	0.11	0.49	0.11	0.5	0.11	0.5	0.13	0.55	0.11	0.42	0.12
DEAP	CWGAN	0.5	0.1	0.5	0.11	0.51	0.11	0.51	0.12	0.55	0.11	0.44	0.12
DEAP	CWGAN-GP	0.51	0.11	0.51	0.12	0.52	0.11	0.52	0.13	0.57	0.12	0.44	0.11
DEAP	Real EEG, Non-EEG Sensory Data	0.51	0.12	0.51	0.12	0.52	0.12	0.52	0.13	0.54	0.11	0.47	0.11
GraffitiVR	Only Non-EEG Sensory Data	0.66	0.14	0.66	0.14	0.67	0.15	0.66	0.14	0.68	0.12	0.64	0.11
GraffitiVR	CGAN	0.68	0.13	0.69	0.14	0.69	0.14	0.68	0.13	0.7	0.13	0.66	0.11
GraffitiVR	CWGAN	0.7	0.14	0.7	0.14	0.71	0.15	0.7	0.12	0.72	0.12	0.68	0.12
GraffitiVR	CWGAN-GP	0.72	0.13	0.72	0.13	0.73	0.14	0.72	0.12	0.74	0.12	0.7	0.1
GraffitiVR	Real EEG, Non-EEG Sensory Data	0.73	0.14	0.73	0.14	0.74	0.15	0.73	0.14	0.76	0.13	0.7	0.11

## Sheet: SeedV
dataset	subject_id	Generated EEG, Non-EEG Sensory Data	Real EEG, Non-EEG Sensory Data	Only Non-EEG Sensory Data	stddev_cwgan_gp	stddev_real	stddev_non_eeg
SEED-V	1	0.767456	0.763956	0.559356	0.0211793	0.0393808	0.0441131
SEED-V	2	0.6907	0.630711	0.542711	0.065272	0.105295	0.0516886
SEED-V	3	0.591911	0.535444	0.443589	0.0482222	0.043354	0.0317393
SEED-V	4	0.781467	0.739556	0.618189	0.032127	0.0469717	0.0366801
SEED-V	5	0.575667	0.493044	0.4447	0.0939579	0.0621752	0.0710634
SEED-V	6	0.6502	0.687989	0.535389	0.0209524	0.0494076	0.0406239
SEED-V	7	0.567533	0.701078	0.417722	0.00476191	0.020011	0.0569643
SEED-V	8	0.618878	0.6872	0.580311	0.0201151	0.0201163	0.0493706
SEED-V	9	0.600589	0.757933	0.487133	0.0388165	0.0290718	0.0402587
SEED-V	10	0.431833	0.378522	0.392967	0.0311717	0.0200951	0.042058
SEED-V	11	0.602278	0.648156	0.612767	0.038665	0.0296777	0.0393143
SEED-V	12	0.524189	0.679278	0.548378	0.00827322	0.0362739	0.0488594
SEED-V	13	0.574489	0.678422	0.478022	0.0511411	0.0553878	0.0223388
SEED-V	14	0.508322	0.500367	0.418389	0.0375607	0.0811705	0.0224475
SEED-V	15	0.4875	0.591322	0.489167	0.0506198	0.0464442	0.0506277
SEED-V	16	0.604689	0.7217	0.488811	0.0215586	0.0277969	0.0216833
SEED-V	mean	0.598606	0.637167	0.5036	0.00377093	0.0326278	0.00892929

## Sheet: Deap
dataset	subject_id	Generated EEG, Non-EEG Sensory Data	Real EEG, Non-EEG Sensory Data	Only Non-EEG Sensory Data	stddev_cwgan_gp	stddev_real	stddev_non_eeg
DEAP	1	0.72165	0.75775	0.717183	0.0414327	0.0143098	0.0344573
DEAP	2	0.4497	0.4358	0.4383	0.0100923	0.00899593	0.0285774
DEAP	3	0.47135	0.4722	0.479433	0.0944568	0.0643111	0.0555606
DEAP	4	0.461083	0.4044	0.427467	0.10175	0.0392856	0.0980509
DEAP	5	0.631367	0.677767	0.581333	0.0379382	0.0136837	0.0136861
DEAP	6	0.625267	0.574683	0.557183	0.0932897	0.0733428	0.0262074
DEAP	7	0.438317	0.47385	0.426367	0.0494903	0.0496767	0.0685498
DEAP	8	0.476383	0.4558	0.41415	0.0744418	0.028947	0.0126977
DEAP	9	0.543583	0.553867	0.489683	0.056973	0.0369228	0.0240251
DEAP	10	0.483867	0.502483	0.474133	0.0392693	0.0415516	0.0062361
DEAP	11	0.4083	0.4147	0.387733	0.0500642	0.0538153	0.0386921
DEAP	12	0.4294	0.4422	0.41745	0.0210393	0.00172772	0.0312287
DEAP	13	0.455817	0.43775	0.434983	0.0307293	0.00787602	0.0437956
DEAP	14	0.4022	0.457467	0.438867	0.0396687	0.0555938	0.0879032
DEAP	15	0.381933	0.352767	0.335533	0.087587	0.0394796	0.0455848
DEAP	16	0.7797	0.768033	0.725533	0.0387495	0.028861	0.0341717
DEAP	mean	0.509995	0.511345	0.484083	0.0491754	0.0288699	0.0351825

## Sheet: GraffitiVR
dataset	subject_id	Generated EEG, Non-EEG Sensory Data	Real EEG, Non-EEG Sensory Data	Only Non-EEG Sensory Data	stddev_cwgan_gp	stddev_real	stddev_non_eeg
GraffitiVR	1	0.899033	0.969667	0.878733	0.017821	0.057686	0.080225
GraffitiVR	2	0.555533	0.694433	0.525533	0.0129378	0.0649415	0.0241229
GraffitiVR	3	0.7222	0.680517	0.498867	0.0488916	0.0131458	0.0492484
GraffitiVR	4	0.555533	0.52775	0.5355	0.075955	0.0813909	0.0464083
GraffitiVR	5	0.666633	0.624967	0.4033	0.068067	0.0467249	0.0709526
GraffitiVR	6	0.848733	0.97	0.829733	0.0273004	0.0420132	0.0326518
GraffitiVR	7	0.750164	0.766163	0.711587	0.0157119	0.0342579	0.0746413
GraffitiVR	8	0.861067	0.847167	0.7044	0.0763433	0.081542	0.0616726
GraffitiVR	9	0.8333	0.791633	0.8233	0.0339737	0.019105	0.0261452
GraffitiVR	10	0.888867	0.944433	0.848867	0.0379524	0.0285446	0.0580243
GraffitiVR	11	0.5151	0.5454	0.5051	0.0487593	0.024544	0.0101046
GraffitiVR	12	0.6666	0.597183	0.6466	0.0170466	0.0488919	0.0543959
GraffitiVR	13	0.8055	0.6805	0.7855	0.0723143	0.0197536	0.071107
GraffitiVR	14	0.805533	0.8333	0.775533	0.0483947	0.0360825	0.0276739
GraffitiVR	15	0.555533	0.5833	0.545533	0.0658678	0.0519231	0.0466779
GraffitiVR	16	0.5933	0.7222	0.5833	0.0612932	0.0291926	0.0654287
GraffitiVR	mean	0.720164	0.736163	0.662587	0.0134782	0.0241656	0.0126706

## Sheet: calibration
Calibration Duration	Generated EEG, Non-EEG Sensory Data	Real EEG, Non-EEG Sensory Data	Only Non-EEG Sensory Data	stddev_cwgan_gp	stddev_real	stddev_non_eeg
0.1	0.555517	0.543758	0.52775	0.0254667	0.0252542	0.02935
0.2	0.596461	0.595256	0.580531	0.0444615	0.0394453	0.0517466
0.3	0.601342	0.609718	0.553727	0.0367503	0.0421274	0.0515576
0.4	0.627511	0.615771	0.593873	0.0356207	0.046459	0.0555458
0.5	0.6528	0.666738	0.640953	0.0582245	0.0564963	0.0580641
0.6	0.662514	0.678105	0.630769	0.0441446	0.0452111	0.0581753
0.7	0.695829	0.706209	0.640849	0.0578257	0.0579653	0.0570559
0.8	0.720164	0.736163	0.662587	0.0595642	0.0560774	0.0562728
0.9	0.780538	0.837486	0.699978	0.0561093	0.0564017	0.0564819
