# Supplementary material for: Improved BCI calibration in multimodal emotion recognition using heterogeneous adversarial transfer learning
Source: PeerJ Comput Sci. 2025 Jan 20;11:e2649. doi: 10.7717/peerj-cs.2649 (PMC11784743; doi:10.7717/peerj-cs.2649)
Supplement: Supplemental Information 3 — Raw performance dataset provides performance metrics for various methods applied to the SEED-V, DEAP, and GraffitiVR datasets. Metrics include Euclidean and Wasserstein distances, as well as KL Divergence, Wasserstein Distance, T Statistic, and T p-value for each EEG frequency band. [file peerj-cs-11-2649-s003.xlsx]

## Sheet: computed_distances
Dataset	Distance Metrics	CGAN	CWGAN	CWGAN-GP
SEED-V	Euclidean	12.33 +/- 3.49	11.8 +/- 3.46	10.27 +/- 2.83
	Wasserstein	0.31 +/- 0.20	0.30 +/- 0.20	0.27 +/- 0.16
DEAP	Euclidean	5.15 +/- 1.05	4.64 +/- 1.05	4.50 +/- 1.07
	Wasserstein	0.20 +/- 0.12	0.19 +/- 0.12	0.17 +/- 0.12
GraffitiVR	Euclidean	4.31 +/- 2.45	3.81 +/- 2.51	3.79 +/- 2.30
	Wasserstein	0.49 +/- 0.41	0.46 +/- 0.44	0.43 +/- 0.41

## Sheet: band_statistics
Dataset	EEG Bands	KL Divergence	Wasserstein Distance	T Statistic	T p-value
SEED-V	Delta	4.07691	0.037153	0.997445	0.318615
	Theta	1.94447	0.022053	-0.294888	0.768096
	Alpha	0.816434	0.033919	0.711048	0.4771
	Beta	1.52241	0.031855	-1.42009	0.155668
	Gamma	0.773198	0.02239	0.025336	0.979788
DEAP	Theta	0.880208	0.01836	-0.554443	0.579327
	Alpha	1.10949	0.015661	0.416468	0.677105
	Beta	0.290337	0.021008	-1.40424	0.160378
	Gamma	4.97289	0.0497777	-0.208283	0.835026
GraffitiVR	Delta	0.65653	0.031004	-1.34055	0.180141
	Theta	0.822431	0.065541	-2.31208	0.020823
	Alpha	1.06368	0.06804	-0.507728	0.611672
	Beta	1.57794	0.086705	-0.520694	0.602609
	Gamma	0.950813	0.079697	0.403704	0.686452
